# Supplementary material
Source: PubMed Central journal article supplement (PMC3725099)
Supplement: 1310604110_pnas.201310604SI.pdf [file 1310604110_pnas.201310604SI.pdf]

# Supporting Information

Lee et al. 10.1073/pnas.1310604110

## SI Materials and Methods

**Reagents.** Anti-zinc-finger antiviral protein (ZAP) antibody (ab105357) was purchased from Abcam. Anti-vesicular stomatitis virus (VSV)-G antibody (A190-131A-2) was purchased from Bethyl Laboratories. Anti-G3BP1 antibody (611126) was purchased from BD Biosciences. Anti-TIA1 antibody (SC-1751) was purchased from Santa Cruz Biotechnology. Anti-HaloTag antibody (G928A) was purchased from Promega. Lipopolysaccharides, R848 and 5' triphosphate dsRNA were purchased from InvivoGen. Poly(rI-rC) was purchased from GE Healthcare. Poly (dA-dT) was purchased from Sigma. Lipofectamine 2000 was purchased from Invitrogen.

**Plasmids.** pFN21A-Halo DEAH (Asp-Glu-Ala-His) box polypeptide 30 (DHX30) was purchased from Promega. pVP62 (GenBank accession no. DQ399707.1) was obtained from the National Institutes of Health AIDS Reagent Program. The pSuperRetro vector was purchased from Oligoengine. The lentiviral expression construct pCS-CDF-CG-PRE was kindly donated by H. Miyoshi (RIKEN, Ibaraki, Japan). The lentiviral shRNA expression construct pCS-Puro-PRE, a derivative of pCS-CDF-CG-PRE, has been described previously (1). Annealed oligonucleotides encoding the *zinc finger CCH-type, antiviral 1 (ZC3HAV1)* sequence (5'-AGTTTCC-AAGGGATGATTC-3') were inserted into pSuperRetro, generating pSR-ZC3HAV1i. The EcoRI/SalI shRNA expression cassette from pSR-ZC3HAV1i was transferred to the EcoRI/XhoI sites in pCS-Puro-PRE, generating pCS-Puro-PRE-ZC3HAV1i. pCMV-ΔR8.2 (Addgene plasmid 12263) and pMD2.G (Addgene plasmid 12259) were donated by D. Trono (Ecole Polytechnique Federale de Lausanne, Lausanne, Switzerland).

**Cells, Viruses, and Lentiviral Gene Transduction.** MT-2 cells have been described previously (2). Replication-competent xenotropic Murine leukemia virus (MLV)-related virus was produced by 293T cells transfected with pVP62. The lentiviral vector was produced by 293T cells transfected with the lentiviral expression constructs, together with pCMV-ΔR8.2 and pMD2.G. For gene transduction, the lentiviral vector was incubated with the target cells for 2 h in the presence of 10 μg/mL Polybrene.

**Generation of *Zc3hav1*<sup>-/-</sup> Mice.** A fragment containing the *Zc3hav1* gene was isolated from genomic DNA extracted from WT ES cells by PCR. A targeting vector was constructed by replacing exon 1 with a neomycin-resistance gene cassette, and the herpes simplex virus thymidine kinase gene driven by the phosphoglycerate kinase (*PGK*) promoter was inserted into the genomic fragment to allow negative selection. After the targeting vector was transfected into ES cells, colonies doubly resistant to G418 and ganciclovir were selected and screened by PCR and Southern blotting. The homologous recombinants were microinjected into C57BL/6 female mice, and heterozygous F1 progeny were crossed to obtain *Zc3hav1*<sup>-/-</sup> mice. The *Zc3hav1*<sup>-/-</sup> mice were generated in a mixed 129Sv and C57BL/6 background.

**Primers.** The primer pairs used in Fig. S2C were as follows: for *Zc3hav1* mRNA, 5'-GCAGGCCAGTAAACACTAGACCCAA-3' and 5'-CTCAGGCTCATCAAACTCCACCCGA-3'; and for *Actb* mRNA, 5'-TGTTACCAACTGGGACGACA-3' and 5'-GGGGTGTGAAGGTCTCAAA-3'.

1. Saitoh Y, et al. (2008) Overexpressed NF-kappaB-inducing kinase contributes to the tumorigenesis of adult T-cell leukemia and Hodgkin Reed-Sternberg cells. *Blood* 111(10):5118-5129.

2. Yamamoto N, Hinuma Y (1985) Viral aetiology of adult T-cell leukaemia. *J Gen Virol* 66 (Pt 8):1641-1660.

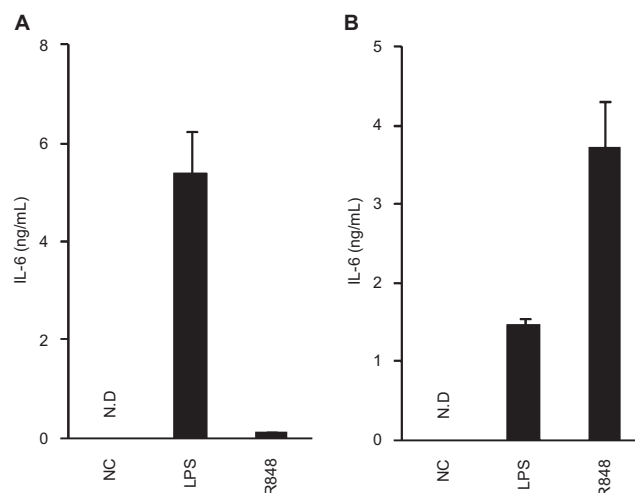

**Fig. S1.** Primary mouse embryonic fibroblasts (MEFs) respond negligibly to R848. MEFs (A) and bone marrow-derived dendritic cells (BMDCs) (B) isolated from C57BL/6 mice were stimulated with LPS (1 μg/mL) and R848 (10 μg/mL) for 24 h. The levels of IL-6 protein in the culture supernatants were measured with ELISA. The results shown are means ± SD (n = 3). ND, not detected.

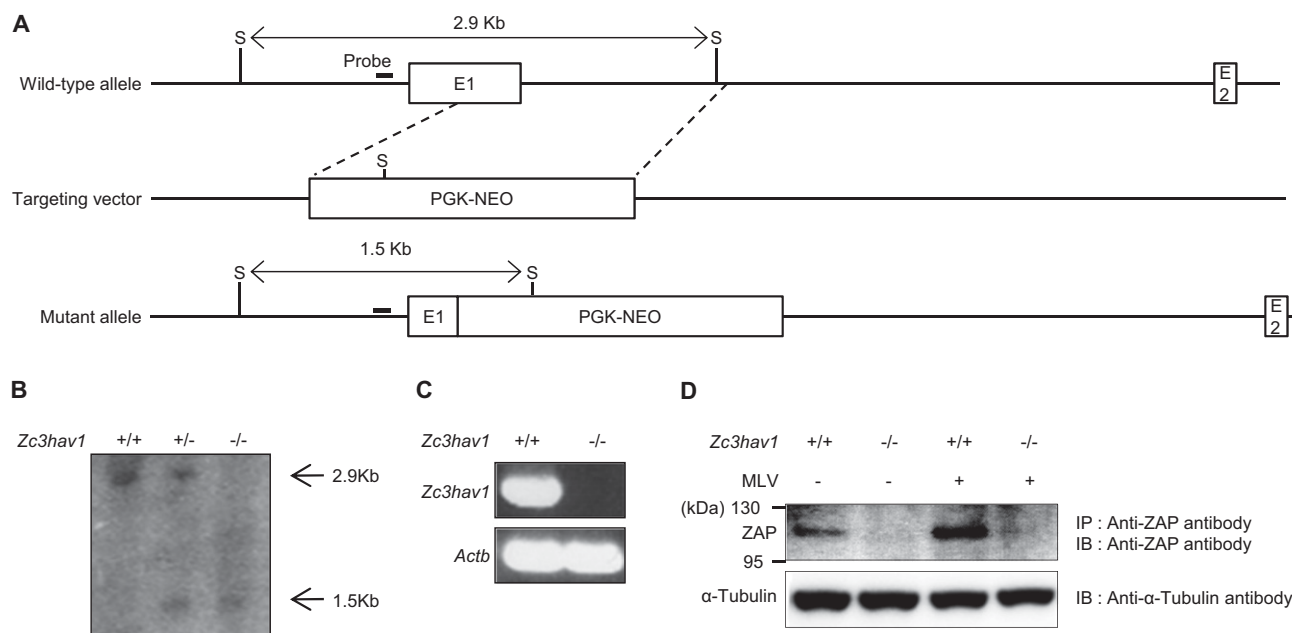

**Fig. S2.** Targeted disruption of the murine *Zc3hav1* gene. (A) Schematic representation of the targeting of the *Zc3hav1* gene. The targeting vector was constructed by replacing exon 1 of the *Zc3hav1* gene with the neomycin resistance gene. E, exon; PGK-Neo, phosphoglycerate kinase (PGK)-promoter-driven neomycin-resistance gene cassette; S, SphI. (B) Genomic DNAs prepared from *Zc3hav1*<sup>+/+</sup>, *Zc3hav1*<sup>+/-</sup>, and *Zc3hav1*<sup>-/-</sup> MEFs were digested with SphI and subjected to Southern blotting. The probe used is shown in A. (C) Total RNAs were isolated from *Zc3hav1*<sup>+/+</sup> and *Zc3hav1*<sup>-/-</sup> MEFs. The levels of *Zc3hav1* and *Actb* mRNAs were measured by RT-PCR. (D) *Zc3hav1*<sup>+/+</sup> and *Zc3hav1*<sup>-/-</sup> MEFs were infected with or without MLV ( $2 \times 10^{10}$  copies per  $\mu$ L) for 72 h. Whole-cell lysates were isolated and subjected to immunoprecipitation coupled to immunoblotting with the indicated antibodies.

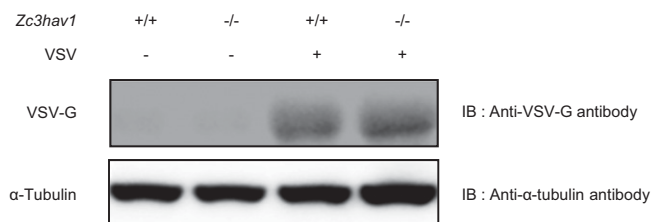

**Fig. S3.** ZAP does not limit the replication of VSV. *Zc3hav1*<sup>+/+</sup> and *Zc3hav1*<sup>-/-</sup> MEFs were infected with or without VSV (MOI = 1) for 12 h. Whole-cell lysates were isolated and subjected to immunoblotting with the indicated antibodies.

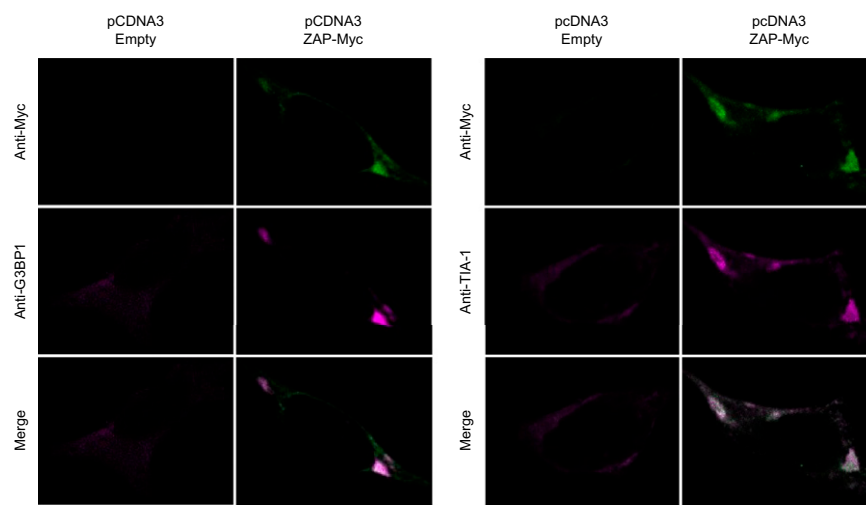

**Fig. S4.** ZAP localizes to the G3BP1- and TIA-1-positive RNA granules. 293T cells were transfected with the indicated vectors and fixed. The samples were subjected to immunostaining with the indicated antibodies and then observed with confocal laser scanning microscopy. The data are representative of three independent experiments. (Scale bars, 10  $\mu$ m.)

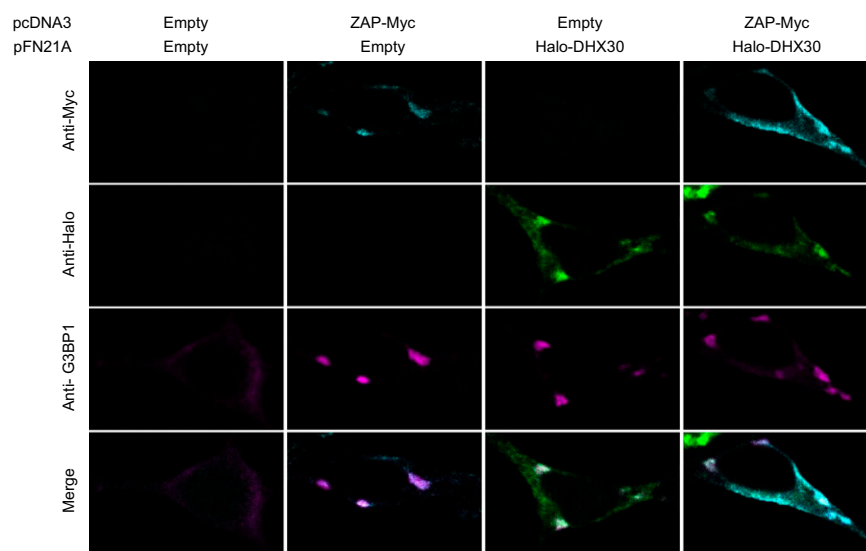

**Fig. S5.** DHX30 colocalizes with ZAP on RNA granules. 293T cells were transfected with the indicated plasmids and then fixed. The samples were subjected to immunostaining with the indicated antibodies and then observed by confocal laser scanning microscopy. The data are representative of three independent experiments. (Scale bar, 10  $\mu$ m.)

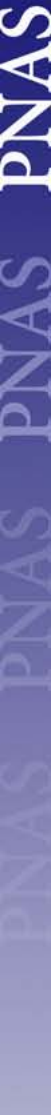

**A** ■ *Zc3hav1*<sup>+/+</sup>  
□ *Zc3hav1*<sup>-/-</sup>

*Ifnb1* mRNA  
(Relative to control)

4000  
3000  
2000  
1000  
0

NC LF 3pRNA

**B** ■ *Zc3hav1*<sup>+/+</sup>  
□ *Zc3hav1*<sup>-/-</sup>

IFN-β (pg/mL)

200  
150  
100  
50  
0

NC LF 3pRNA

**C** ■ *Zc3hav1*<sup>+/+</sup>  
□ *Zc3hav1*<sup>-/-</sup>

IFN-β (ng/mL)

3  
2  
1  
0

NC LF Poly (rl-rC) Poly (dA-dT)

Lee et al. [www.pnas.org/cgi/content/short/1310604110](http://www.pnas.org/cgi/content/short/1310604110) 4 of 5
